# Supplementary material for: Probing the microscopic structure and flexibility of oxidized DNA by molecular simulations
Source: Springer Nature journal article supplement (doi:10.1007/s12648-022-02299-y), 2022-03-17
Supplement: 12648_2022_2299_MOESM1_ESM.pdf [file 12648_2022_2299_MOESM1_ESM.pdf]

# Supplementary Information

## Probing the microscopic structure and flexibility of oxidized DNA by molecular simulations

Khadka B. Chhetri,<sup>†,‡</sup> Supriyo Naskar,<sup>†</sup> and Prabal K. Maiti<sup>\*,†</sup>

<sup>†</sup>*Center for Condensed Matter Theory, Department of Physics, Indian Institute of Science, Bangalore 560012, India*

<sup>‡</sup>*Department of Physics, Prithvinarayan Campus, Tribhuvan University, Nepal*

E-mail: maiti@iisc.ac.in

Phone: +91-80-2293-2865. Fax: +91-80-2360-2602

## S.1 Persistence length using $P(\theta) \sim e^{-\frac{\beta\kappa}{2L_0}(\theta-\theta_0)^2}$

Considering the intrinsic curvature of dsDNA duplex, we subtracted the angle  $\theta_0 = \langle \theta \rangle$  of the equilibrated structure in each bending angle  $\theta$  and used it to compute the persistence length.

With this approach, the equations 1 and 2 of the main article take following forms.

$$P(\theta) = \sqrt{\frac{\beta\kappa}{2\pi L_0}} e^{-\frac{\beta\kappa}{2L_0}(\theta-\theta_0)^2} \quad (\text{S.1})$$

where,  $\theta_0$  is the time average of the bending angle of the duplex over all frames. With it,  $\theta' = \theta - \theta_0$  is the bending angle of the duplex with respect to its equilibrated structure.

For small angle  $\theta' = \theta - \theta_0$ , equation S.1 can be approximated as:

$$\ln P(\theta) = -\frac{l_p}{L_0}(1 - \cos\theta') + \frac{1}{2}\ln\left(\frac{\beta\kappa}{2\pi L_0}\right) \quad (\text{S.2})$$

where,  $\kappa = \frac{l_p}{\beta} = K_B T l_p$  is the bending modulus,  $T$  is temperature of the system in Kelvin, and  $K_B$  is the Boltzmann's constant. From the slope of the graph of  $\ln P(\theta)$  versus  $(1 - \cos\theta')$  we can compute the persistence length using:  $\text{slope} = -\frac{l_p}{L_0}$ .

With it, the new values of persistence lengths are slightly changed from the results presented in the main article but follow the same trend. The results with this approach and the approach used in the main article are presented in the table St.1.

Table St.1: Persistence lengths using equation 1 (of main article) and equation S.1

| System      | Persistence Length( $l_p$ ) in nm [a]                | Persistence Length( $l_p$ ) in nm [b]                           |
|-------------|------------------------------------------------------|-----------------------------------------------------------------|
|             | Using $P(\theta) \sim e^{-\frac{l_p}{2L_0}\theta^2}$ | Using $P(\theta) \sim e^{-\frac{l_p}{2L_0}(\theta-\theta_0)^2}$ |
| dsDNA       | $48.87 \pm 1.81$                                     | $53.13 \pm 2.93$                                                |
| dsDNA(4oxG) | $58.61 \pm 2.06$                                     | $62.87 \pm 4.02$                                                |
| dsDNA(80xG) | $61.31 \pm 2.44$                                     | $67.28 \pm 3.25$                                                |

The procedures followed in computing the persistence lengths  $l_p$  are based on the theories of Mazur<sup>1</sup> and Mogurampelly et al.<sup>2</sup> Here, [a] corresponds to the approach used in the main article and [b] corresponds to the approach used in this supplementary information (SI). Using the two approaches, the  $l_p$  values are found to vary slightly but follow the same trend described in the main article.

Linear fit plots for contour length and bending angle data of the duplexes:

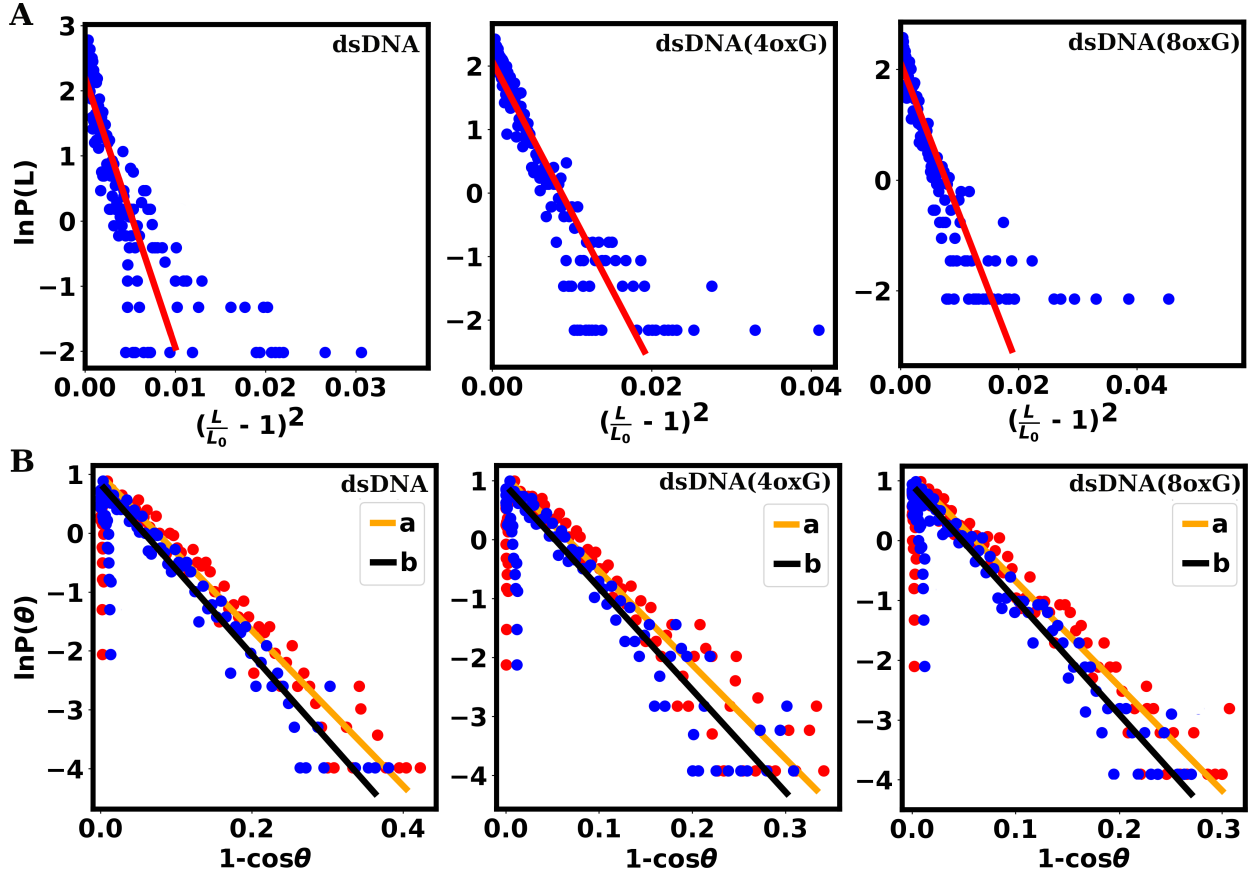

Figure SF. 1: Linear fit plots. [A]:  $\ln P(L)$  versus  $(\frac{L}{L_0} - 1)^2$  and [B]:  $\ln P(\theta)$  versus  $(1 - \cos\theta)$ . In lower panel, **a** corresponds to the line obtained with equation  $\ln P(\theta) = -\frac{l_p}{L_0}(1 - \cos\theta) + \frac{1}{2}\ln\left(\frac{\beta\kappa}{2\pi L_0}\right)$  and **b** corresponds to the line obtained with equation  $\ln P(\theta) = -\frac{l_p}{L_0}(1 - \cos\theta') + \frac{1}{2}\ln\left(\frac{\beta\kappa}{2\pi L_0}\right)$ .

## S.2 Backbone torsion angles of the duplexes

Table St.2: Averages of backbone torsion angles and sugar puckers

| Torsion            | Duplex      | 2 I               | 4 I               | 7 I               | 10 I              | 14 II             | 16 II             | 19 II             | 22 II             |
|--------------------|-------------|-------------------|-------------------|-------------------|-------------------|-------------------|-------------------|-------------------|-------------------|
| $\alpha$           | dsDNA       | 282.52<br>(18.44) | 287.49<br>(12.15) | 293.85<br>(11.03) | 286.47<br>(14.72) | 283.89<br>(15.54) | 287.26<br>(12.22) | 293.84<br>(9.93)  | 282.82<br>(30.02) |
|                    | dsDNA(4oxG) | 278.08<br>(45.11) | 286.21<br>(11.51) | 294.52<br>(9.88)  | 285.86<br>(19.40) | 284.86<br>(26.85) | 285.51<br>(16.80) | 294.56<br>(10.12) | 284.91<br>(13.15) |
|                    | dsDNA(8oxG) | 264.49<br>(61.33) | 280.20<br>(25.27) | 294.71<br>(9.95)  | 282.59<br>(28.82) | 274.68<br>(41.19) | 282.83<br>(12.88) | 294.42<br>(13.54) | 280.84<br>(34.21) |
| $\beta$            | dsDNA       | 162.42<br>(23.94) | 161.09<br>(18.35) | 180.26<br>(16.60) | 162.66<br>(21.16) | 161.01<br>(23.19) | 160.88<br>(18.38) | 179.36<br>(16.46) | 163.09<br>(21.6)  |
|                    | dsDNA(4oxG) | 168.14<br>(16.13) | 165.19<br>(11.44) | 177.90<br>(16.36) | 161.90<br>(20.16) | 167.74<br>(16.26) | 165.38<br>(12.01) | 178.96<br>(16.54) | 162.30<br>(19.99) |
|                    | dsDNA(8oxG) | 172.92<br>(19.29) | 166.62<br>(12.17) | 176.26<br>(16.10) | 169.11<br>(11.91) | 172.12<br>(18.19) | 166.49<br>(11.37) | 176.41<br>(16.43) | 169.11<br>(12.10) |
| $\gamma$           | dsDNA       | 52.48<br>(19.05)  | 52.44<br>(11.05)  | 55.48<br>(8.68)   | 51.40<br>(14.29)  | 51.01<br>(13.86)  | 52.14<br>(11.40)  | 55.37<br>(8.69)   | 53.44<br>(23.29)  |
|                    | dsDNA(4oxG) | 58.92<br>(38.68)  | 51.31<br>(9.06)   | 56.18<br>(8.69)   | 50.71<br>(20.2)   | 53.63<br>(19.31)  | 51.76<br>(12.38)  | 56.17<br>(8.77)   | 49.75<br>(14.12)  |
|                    | dsDNA(8oxG) | 71.73<br>(37.22)  | 51.25<br>(19.44)  | 56.47<br>(8.82)   | 50.97<br>(28.17)  | 56.86<br>(42.18)  | 49.21<br>(10.40)  | 56.66<br>(11.86)  | 52.75<br>(34.01)  |
| $\epsilon$         | dsDNA       | 192.93<br>(33.83) | 221.65<br>(42.13) | 180.40<br>(14.33) | 204.85<br>(40.56) | 192.61<br>(32.29) | 222.18<br>(41.58) | 180.34<br>(14.56) | 204.15<br>(39.36) |
|                    | dsDNA(4oxG) | 258.89<br>(23.04) | 256.05<br>(22.05) | 179.34<br>(14.21) | 207.64<br>(40.41) | 259.48<br>(22.58) | 256.01<br>(21.98) | 179.41<br>(13.87) | 208.96<br>(41.51) |
|                    | dsDNA(8oxG) | 261.61<br>(23.54) | 257.60<br>(21.77) | 179.32<br>(13.42) | 262.66<br>(20.37) | 260.77<br>(23.31) | 257.49<br>(21.84) | 179.13<br>(13.58) | 261.99<br>(20.83) |
| $\zeta$            | dsDNA       | 251.59<br>(40.18) | 214.49<br>(50.53) | 266.53<br>(13.91) | 236.30<br>(50.08) | 252.27<br>(14.60) | 214.61<br>(50.61) | 266.46<br>(14.24) | 237.71<br>(49.27) |
|                    | dsDNA(4oxG) | 162.16<br>(20.29) | 169.14<br>(18.16) | 267.31<br>(13.24) | 235.44<br>(51.19) | 161.75<br>(20.49) | 169.18<br>(17.98) | 267.35<br>(12.98) | 233.10<br>(52.18) |
|                    | dsDNA(8oxG) | 160.35<br>(22.76) | 166.85<br>(18.42) | 267.42<br>(12.87) | 159.25<br>(18.87) | 161.49<br>(21.50) | 167.10<br>(18.31) | 267.52<br>(12.73) | 159.56<br>(18.85) |
| $\epsilon - \zeta$ | dsDNA       | -58.65<br>(72.14) | 7.15<br>(91.04)   | -86.12<br>(25.29) | -31.45<br>(89.08) | -59.97<br>(68.98) | 7.56<br>(90.52)   | -86.10<br>(25.91) | -33.56<br>(86.89) |
|                    | dsDNA(4oxG) | 96.72<br>(40.57)  | 86.91<br>(37.21)  | -87.96<br>(24.47) | -27.80<br>(90.14) | 97.73<br>(40.71)  | 86.83<br>(36.77)  | -87.94<br>(23.75) | -24.14<br>(92.18) |
|                    | dsDNA(8oxG) | 101.26<br>(43.79) | 90.74<br>(37.18)  | -88.10<br>(23.25) | 103.41<br>(37.12) | 99.29<br>(42.26)  | 90.39<br>(37.12)  | -88.39<br>(23.22) | 102.43<br>(37.31) |
| $\chi$             | dsDNA       | 253.75<br>(14.97) | 259.60<br>(15.19) | 244.61<br>(13.12) | 254.36<br>(14.56) | 252.27<br>(14.60) | 259.75<br>(15.19) | 244.27<br>(13.29) | 253.45<br>(15.11) |
|                    | dsDNA(4oxG) | 263.53<br>(13.93) | 268.59<br>(12.68) | 241.88<br>(13.64) | 254.65<br>(14.67) | 264.62<br>(14.50) | 262.97<br>(12.48) | 241.81<br>(13.61) | 254.90<br>(14.43) |
|                    | dsDNA(8oxG) | 264.01<br>(15.18) | 267.32<br>(12.85) | 240.78<br>(13.73) | 264.39<br>(12.78) | 263.60<br>(15.24) | 263.68<br>(12.79) | 240.86<br>(13.73) | 264.62<br>(12.86) |
| $\phi$             | dsDNA       | 165.54<br>(24.01) | 152.97<br>(23.63) | 138.13<br>(24.05) | 160.69<br>(25.90) | 164.99<br>(24.83) | 153.38<br>(23.96) | 137.11<br>(24.99) | 160.97<br>(27.22) |
|                    | dsDNA(4oxG) | 140.47<br>(17.80) | 142.02<br>(13.68) | 134.71<br>(24.51) | 160.84<br>(24.40) | 139.69<br>(16.41) | 141.96<br>(14.08) | 137.32<br>(24.49) | 160.52<br>(23.94) |
|                    | dsDNA(8oxG) | 142.27<br>(20.87) | 139.37<br>(13.17) | 132.47<br>(24.67) | 139.19<br>(14.34) | 139.43<br>(17.70) | 139.27<br>(12.59) | 136.84<br>(24.56) | 139.56<br>(15.21) |
| $\nu_m$            | dsDNA       | 36.60<br>(7.14)   | 40.48<br>(7.34)   | 37.63<br>(6.33)   | 38.10<br>(7.57)   | 36.67<br>(7.01)   | 40.44<br>(7.42)   | 37.65<br>(6.33)   | 37.96<br>(7.72)   |
|                    | dsDNA(4oxG) | 45.21<br>(5.89)   | 44.58<br>(5.14)   | 38.05<br>(6.38)   | 38.57<br>(7.85)   | 45.01<br>(5.95)   | 44.56<br>(5.23)   | 38.08<br>(6.33)   | 38.81<br>(7.89)   |
|                    | dsDNA(8oxG) | 45.24<br>(6.34)   | 46.10<br>(5.01)   | 38.38<br>(6.37)   | 46.88<br>(5.28)   | 45.87<br>(6.05)   | 46.10<br>(5.04)   | 38.26<br>(6.35)   | 46.65<br>(5.43)   |

Mean and standard deviation (shown in parentheses) of backbone torsion angles, sugar ring pucker amplitude ( $\nu_m$ ), and phase angle ( $\phi$ ). All values are in degree.

## References

- (1) Mazur, A. K. Wormlike Chain Theory and Bending of Short DNA. *Phys. Rev. Lett.* **2007**, *98*, 218102.
- (2) Mogurampelly, S.; Nandy, B.; Netz, R. R.; Maiti, P. K. Elasticity of DNA and the effect of dendrimer binding. *The European Physical Journal E* **2013**, *36*, 68.
